# Supplementary material for: Insights into the capture mechanism of CO2 by diamine-appended Mg2(dobpdc): a combined DFT and microkinetic modeling study
Source: Royal Society of Chemistry journal article supplement (doi:10.1039/d3tc01381b), 2023-01-01
Supplement: d3tc01381b1.pdf [file d3tc01381b1.pdf]

## Supplementary information

Insights into the capture mechanism of CO<sub>2</sub> by diamine-appended

Mg<sub>2</sub>(dobpdc): a combined DFT and microkinetic modeling study

*Kuan-Yu Lin, Zhong-Ming Xie, Lu-Sheng Hong, and Jyh-Chiang Jiang\**

Department of Chemical Engineering, National Taiwan University of Science and

Technology, Taipei, Taiwan

### **Corresponding Author**

\*Email: [jcjiang@mail.ntust.edu.tw](mailto:jcjiang@mail.ntust.edu.tw) (J.-C. J.)

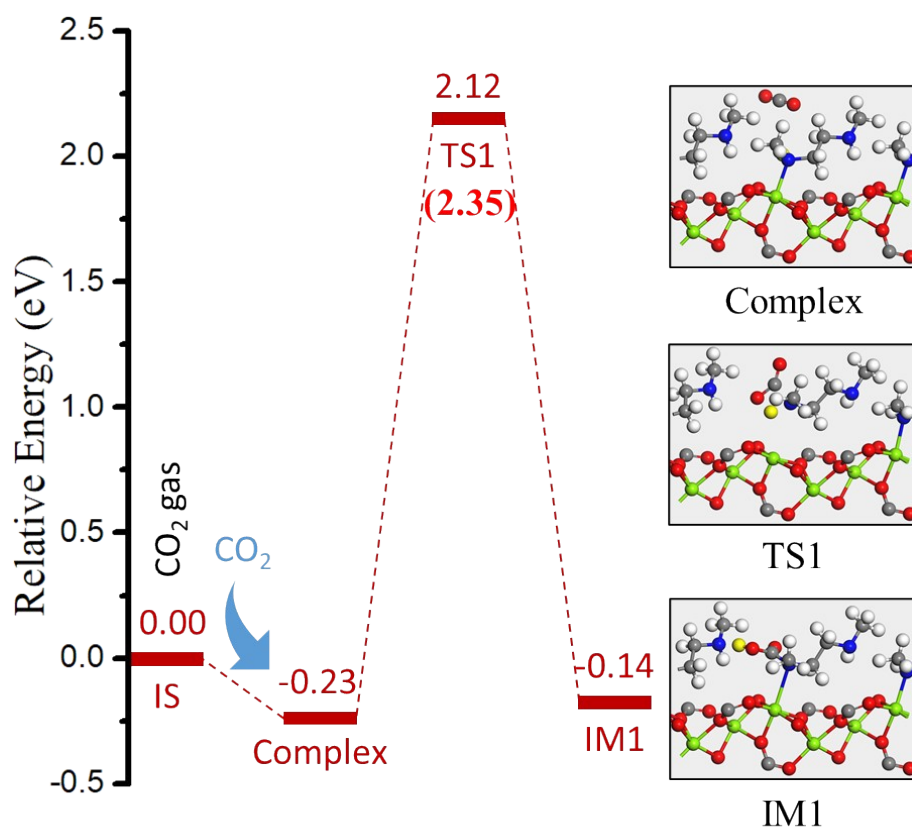

**Fig. S1.** Potential energy surface of CO<sub>2</sub> adsorption on the inner amine of the mmen molecule in the mmen-Mg<sub>2</sub>(dobpdc) structure. Side views of the optimized geometries of CO<sub>2</sub> adsorption along reaction path 2. [Color code: green-magnesium; gray-carbon; blue-nitrogen; red-oxygen; white-hydrogen.]

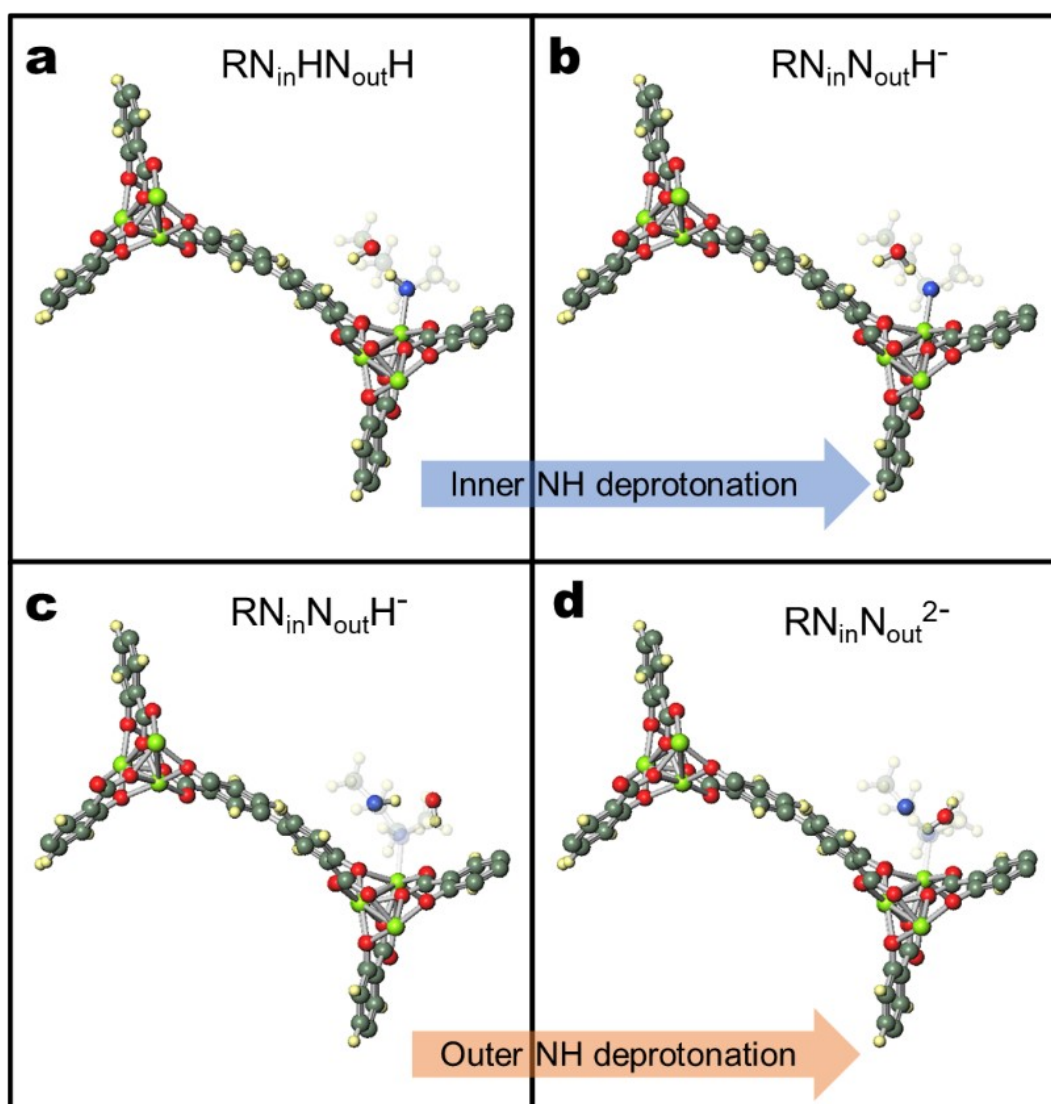

**Fig. S2.** Optimized structures of the deprotonation reaction of the inner and outer amine in  $Mg_2(dobpdc)$  within an alkaline solution (1M KOH). The reaction was investigated using Quantum Espresso with the 3D-RISM solution method.

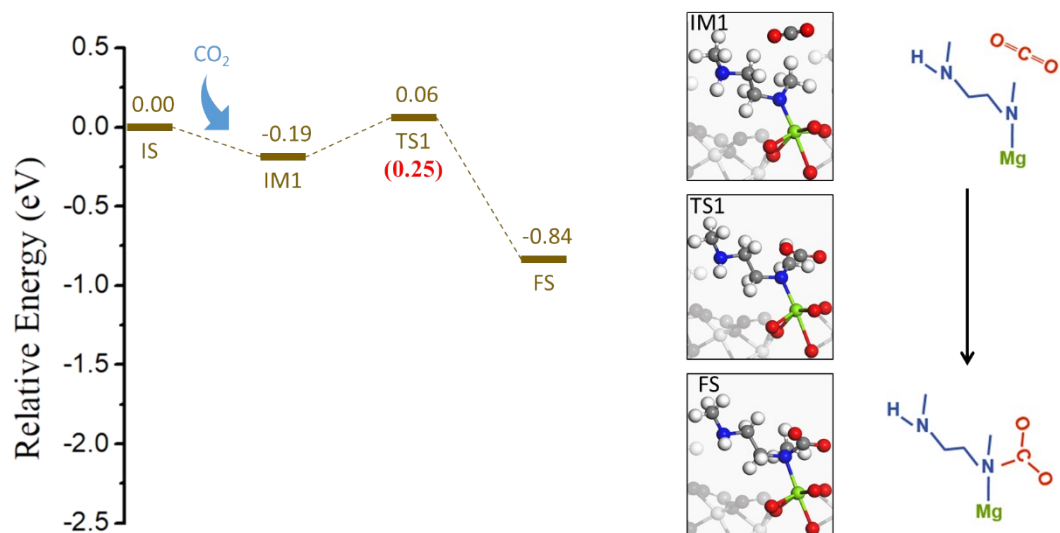

**Fig. S3.** Potential energy surface of CO<sub>2</sub> adsorption on the inner amine of the mmen molecule in mmen-Mg<sub>2</sub>(dobpdc) in an alkaline environment. [Color code: green-magnesium; gray-carbon; blue-nitrogen; red-oxygen; white-hydrogen.]

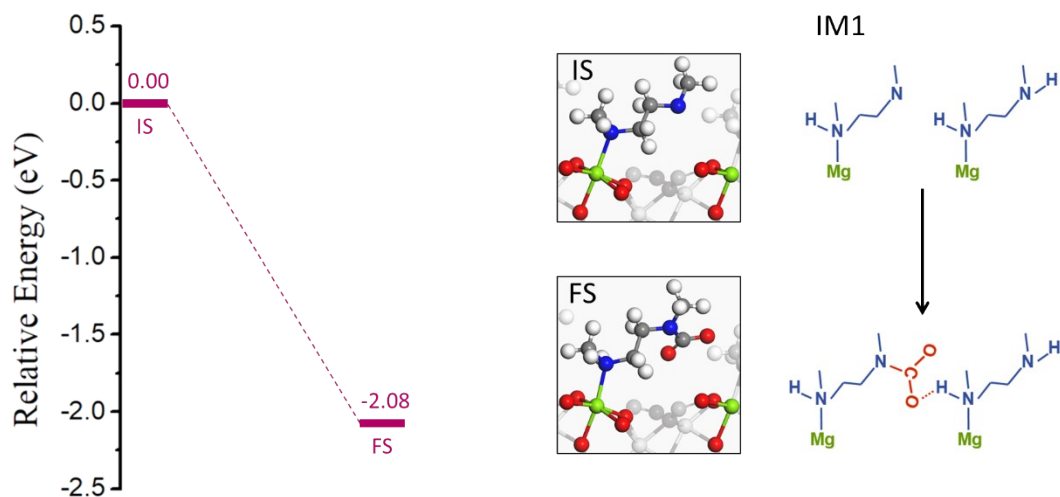

**Fig. S4.** Potential energy surface of CO<sub>2</sub> adsorption on the outer of the mmen molecule in mmen-Mg<sub>2</sub>(dobpdc) in an alkaline environment. [Color code: green-magnesium; gray-carbon; blue-nitrogen; red-oxygen; white-hydrogen.]

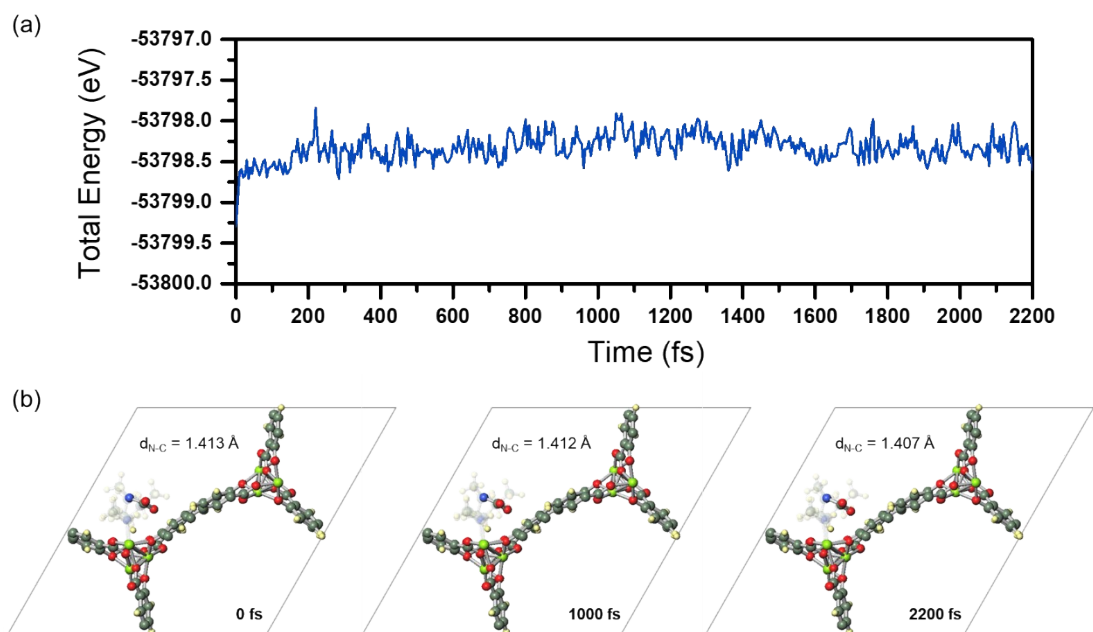

**Fig. S5.** (a) The calculated total energy (eV) as a function of the simulation time (fs) was computed for CO<sub>2</sub> adsorption on the outer amine site in mmen-Mg<sub>2</sub>(dobpdc) under an alkaline environment with pH = 14. (b) Side views of snapshots are presented at simulation times of 0, 1000, and 2200 fs.

**Table S1.** Selected geometrical parameters (Å) of CO<sub>2</sub> molecule adsorbed on the inner amine site of the mmen molecule in the mmen-Mg<sub>2</sub>(dobpdc) structure along reaction path 1.

|     | N <sup>1</sup> -H | N <sup>2</sup> -H | O <sup>2</sup> -H | C-O <sup>1</sup> | C-O <sup>2</sup> | C-N <sup>1</sup> | Mg-N <sup>1</sup> | Mg-O <sup>1</sup> |
|-----|-------------------|-------------------|-------------------|------------------|------------------|------------------|-------------------|-------------------|
| IS  | 1.03              | 3.27              | -                 | -                | -                | -                | 2.25              | -                 |
| TS1 | 1.61              | 1.19              | -                 | -                | -                | -                | 2.13              | -                 |
| IM1 | 2.83              | 1.04              | -                 | -                | -                | -                | 2.04              | -                 |
| IM2 | 2.86              | 1.04              | 5.48              | 1.18             | 1.18             | 6.32             | 2.04              | -                 |
| TS2 | -                 | 1.04              | 2.63              | 1.21             | 1.21             | 2.25             | 2.18              | -                 |
| IM3 | -                 | 1.61              | 1.05              | 1.23             | 1.34             | 1.41             | 2.79              | 3.88              |
| TS3 | -                 | 1.66              | 1.05              | 1.24             | 1.34             | 1.37             | 3.53              | 3.25              |
| FS  | -                 | 1.60              | 1.06              | 1.26             | 1.33             | 1.36             | -                 | 2.02              |

**Table S2.** Selected geometrical parameters (Å) of CO<sub>2</sub> molecule adsorbed on the outer amine site of the mmen molecule in the mmen-Mg<sub>2</sub>(dobpdc) structure along reaction path 3.

|     | N-H  | O <sup>2</sup> -H | C-O <sup>1</sup> | C-O <sup>2</sup> | C-N  | Mg-N | O <sup>3</sup> -H |
|-----|------|-------------------|------------------|------------------|------|------|-------------------|
| IS  | 1.03 | -                 | -                | -                | -    | -    | -                 |
| IM1 | 1.03 | 3.97              | 1.18             | 1.17             | 3.09 | 2.25 | -                 |
| TS1 | 1.22 | 1.38              | 1.21             | 1.29             | 1.59 | 2.27 | -                 |
| IM2 | 2.44 | 0.98              | 1.23             | 1.38             | 1.37 | 2.26 | 3.13              |
| TS2 | -    | 0.98              | 1.22             | 1.35             | 1.45 | 2.26 | 2.40              |
| FS  | -    | 1.01              | 1.25             | 1.35             | 1.37 | 2.25 | 1.65              |



**Table S3.** Activation energies and backward barrier energies of each reaction pathway used for microkinetic simulations.

| Path 1                   | Total Energy (eV) |           |            | Activation Energy (eV) |        |            | Backward Barrier (eV) |        |            |
|--------------------------|-------------------|-----------|------------|------------------------|--------|------------|-----------------------|--------|------------|
|                          | DFT Energy        | ZPE       | $\Delta G$ | DFT Energy             | ZPE    | $\Delta G$ | DFT Energy            | ZPE    | $\Delta G$ |
| IS                       | -1425.394         | -1415.295 | -1416.550  |                        |        |            |                       |        |            |
| TS1(H shift)             | -1423.707         | -1413.774 | -1414.989  | 1.687                  | 1.521  | 1.561      | 0.068                 | -0.065 | -0.127     |
| IM1(NH <sub>2</sub> )    | -1423.775         | -1413.710 | -1414.861  |                        |        |            |                       |        |            |
| IM2(CO <sub>2</sub> ads) | -1423.979         | -1413.889 | -1414.621  | -0.204                 | -0.179 | 0.240      |                       |        |            |
| TS2                      | -1423.557         | -1413.436 | -1414.139  | 0.422                  | 0.453  | 0.482      | 1.989                 | 1.947  | 1.949      |
| IM3(HCOON)               | -1425.546         | -1415.383 | -1416.089  |                        |        |            |                       |        |            |
| TS3                      | -1425.512         | -1415.384 | -1416.158  | 0.034                  | -0.001 | -0.070     | 0.699                 | 0.668  | 0.599      |
| FS(Mg-O)                 | -1426.211         | -1416.052 | -1416.757  |                        |        |            |                       |        |            |

| Path 2                   | Total Energy (eV) |           |            | Activation Energy (eV) |        |            | Backward Barrier (eV) |       |            |
|--------------------------|-------------------|-----------|------------|------------------------|--------|------------|-----------------------|-------|------------|
|                          | DFT Energy        | ZPE       | $\Delta G$ | DFT Energy             | ZPE    | $\Delta G$ | DFT Energy            | ZPE   | $\Delta G$ |
| IS                       | -1425.394         | -1415.295 | -1416.550  |                        |        |            |                       |       |            |
| IM1(CO <sub>2</sub> ads) | -1425.636         | -1415.529 | -1416.372  | -0.242                 | -0.234 | 0.178      |                       |       |            |
| TS1                      | -1423.283         | -1413.294 | -1414.064  | 2.352                  | 2.236  | 2.308      | 2.263                 | 2.090 | 2.025      |
| IM2(HCOON)               | -1425.546         | -1415.383 | -1416.089  |                        |        |            |                       |       |            |

  

| Path 3                    | Total Energy (eV) |           |            | Activation Energy (eV) |        |            | Backward Barrier (eV) |       |            |
|---------------------------|-------------------|-----------|------------|------------------------|--------|------------|-----------------------|-------|------------|
|                           | DFT Energy        | ZPE       | $\Delta G$ | DFT Energy             | ZPE    | $\Delta G$ | DFT Energy            | ZPE   | $\Delta G$ |
| IS                        | -1425.394         | -1415.295 | -1416.550  |                        |        |            |                       |       |            |
| IM1 (CO <sub>2</sub> ads) | -1425.629         | -1415.496 | -1416.236  | -0.236                 | -0.200 | 0.314      |                       |       |            |
| TS1                       | -1424.345         | -1414.292 | -1415.037  | 1.284                  | 1.203  | 1.198      | 1.229                 | 1.116 | 1.148      |
| IM2 (HCOON)               | -1425.575         | -1415.409 | -1416.185  |                        |        |            |                       |       |            |
| TS2                       | -1425.058         | -1414.901 | -1415.593  | 0.517                  | 0.508  | 0.592      | 0.836                 | 0.810 | 0.866      |
| FS (H bond)               | -1425.894         | -1415.711 | -1416.460  |                        |        |            |                       |       |            |

We calculated the ratio of deprotonated mmen molecules according to the following equations:

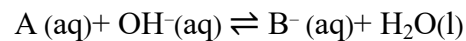

$$\Delta G = -RT \ln K$$

$$K = \frac{[B^-]}{[A][OH^-]}$$

where  $\Delta G$ ,  $R$ , and  $K$  indicates the free energy change of reaction, the constant of 8.314 J/(mol·K), and the equilibrium constant at room temperature, respectively.

**Table S4.** The Reaction energy ( $\Delta G$  in eV), rate constant ( $K_{eq}$ ) of deprotonation reaction of inner and outer amine, and the ratio of deprotonated mmen molecules ( $B/A$ ) were determined under an alkaline environment of 1M KOH.

|              | A                   | B                     | $\Delta G$ (eV) | $K_{eq}$ | B/A     |
|--------------|---------------------|-----------------------|-----------------|----------|---------|
| <b>pH=11</b> | $RN_{in}HN_{out}H$  | $RN_{in}N_{out}H^-$   | 0.105           | 0.893    | 8.9E-04 |
|              | $RN_{in}N_{out}H^-$ | $RN_{in}N_{out}^{2-}$ | 0.164           | 0.838    | 7.5E-07 |
|              | A                   | B                     | $\Delta G$ (eV) | $K_{eq}$ | B/A     |
| <b>pH=14</b> | $RN_{in}HN_{out}H$  | $RN_{in}N_{out}H^-$   | 0.148           | 0.853    | 0.853   |
|              | $RN_{in}N_{out}H^-$ | $RN_{in}N_{out}^{2-}$ | 0.170           | 0.833    | 0.710   |
